# Supplementary material for: Desirable Components for a Customized, Home-Based, Digital Care-Management App for Children and Young People With Long-Term, Chronic Conditions: A Qualitative Exploration
Source: PubMed Central journal article supplement (PMC5516103; doi:10.2196/jmir.7760), 2017-07-04
Supplement: jmir_v19i7e235_app1.pdf [file jmir_v19i7e235_app1.pdf]

---

## **Design and usability features suggested by participants**

---

- well designed so users would want to download the app
  - easy to use (especially for users who have cognitive difficulties)
  - engaging and useful so they would want to continue using it
  - exciting and fun
  - interactive (e.g. swipe/tap screen to get more information)
  - be very visual
  - have an audio function for text for users with literacy difficulties
  - not be too complex
  - use humour
  - spell out how to pronounce complex words
  - avoid acronyms where possible and/or explain commonly used ones
  - have regular updates/daily 'bites' especially in relation to hearing other patient's stories
  - for younger children provide opportunities for interaction between the child and their parent/s
  - be relevant
  - provide notifications when new content is added to the app
  - app logo to be distinctive and stand out
-
